# Supplementary material for: Enrichment of phosphate-accumulating organisms (PAOs) in a microfluidic model biofilm system by mimicking a typical aerobic granular sludge feast/famine regime
Source: PubMed Central journal article supplement (PMC8816403; doi:10.1007/s00253-022-11759-8), 2022-01-15
Supplement: 253_2022_11759_MOESM1_ESM.pdf [file 253_2022_11759_MOESM1_ESM.pdf]

1 **SUPPLEMENTARY INFORMATION**

2 Supporting and additional information of our findings. This file contains images and data  
3 which are meant to give a better idea of our experiment and findings as well as results of side  
4 and evaluating experiments.

5

6 **Journal name: Applied Microbiology and Biotechnology**

7

8 **Article title: Enrichment of phosphate-accumulating organisms (PAOs) in a microfluidic**  
9 **model biofilm system by mimicking a typical aerobic granular sludge feast/famine regime**

10

11 *Edina Klein<sup>1,2</sup>, Janek Weiler<sup>1</sup>, Michael Wagner<sup>2,3</sup>, Minja Čelikić<sup>2</sup>, Christof M. Niemeyer<sup>2</sup>, Harald Horn<sup>3</sup>, Johannes*  
12 *Gescher<sup>1,2\*</sup>*

13

14 <sup>1</sup>Institute for Technical Microbiology (TMI), Hamburg University of Technology (TUHH), Kasernenstr. 12, 21073  
15 Hamburg, Germany

16 <sup>2</sup>Institute for Biological Interfaces (IBG-1), Karlsruhe Institute of Technology (KIT), Hermann-von-Helmholtz  
17 Platz 1, 76344 Eggenstein-Leopoldshafen, Germany

18 <sup>3</sup>Engler-Bunte-Institut (EBI), Water Chemistry and Water Technology, Karlsruhe Institute of Technology (KIT),  
19 Engler-Bunte-Ring 9a, 76131 Karlsruhe

20

21

22 \*Correspondence and requests for materials should be addressed to J.G. (email: johannes.gescher@tuhh.de).

23

24

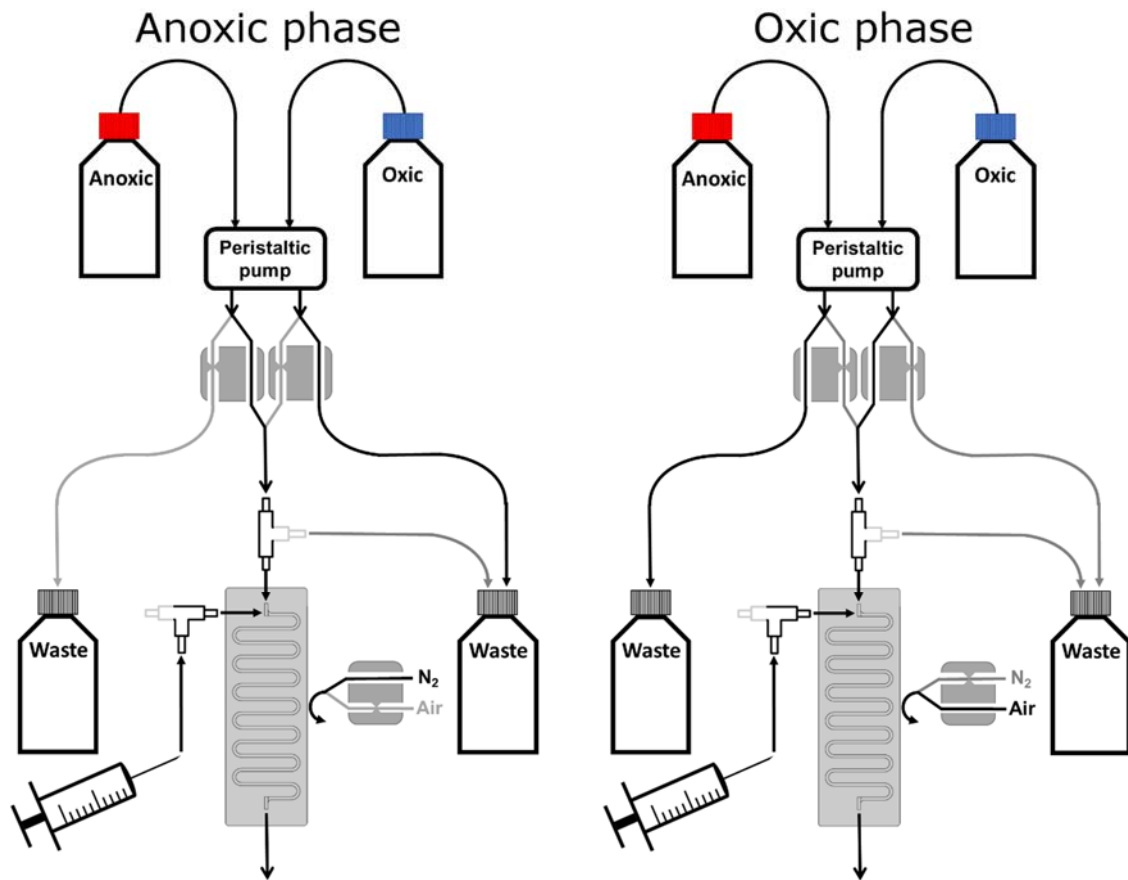

S1. Schematic diagram of the medium supply and gas flow during the anoxic and oxic phases. During the anoxic phase (left), the anaerobic carbon-containing medium is pumped into the microfluidic chips and the oxic medium into waste bottles. During the oxic phase (right), it is reversed. In addition, the separate side port used for inoculation (see syringe) is visible.

25

26

27

28

29

30

31

32

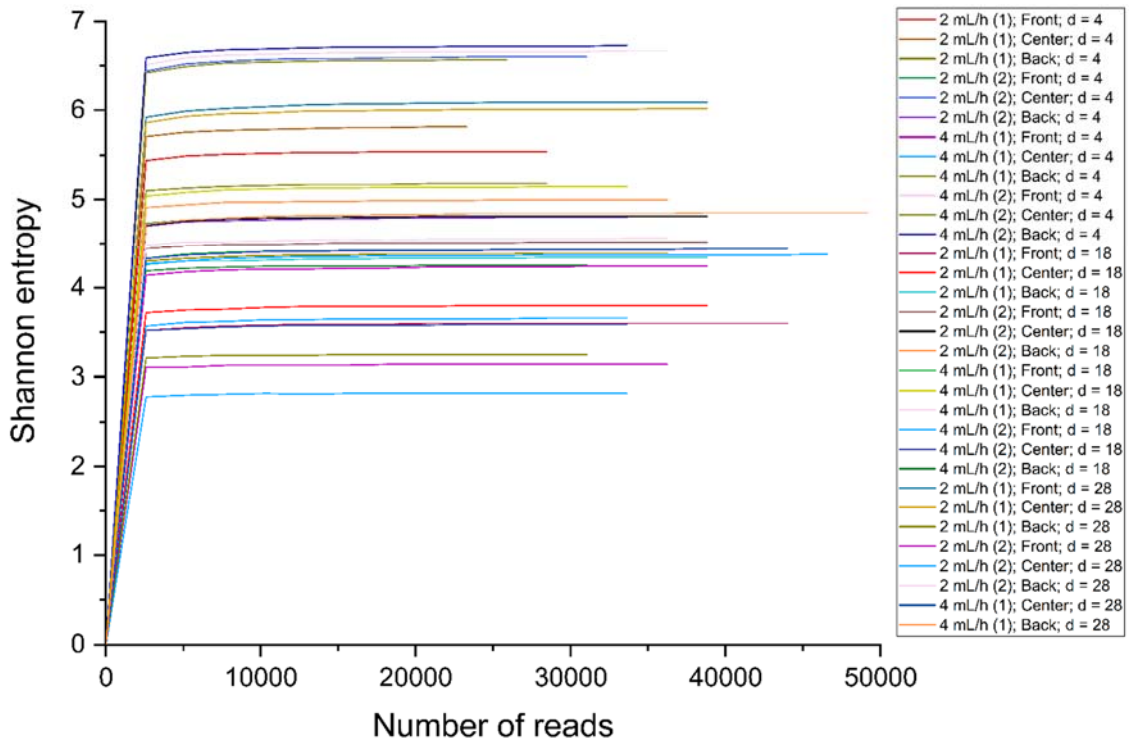

S2. Rarefaction curves of alpha diversity shown as Shannon entropy (Shannon 1997) of the microbial communities. Since our samples showed unequal sampling depth, we investigated alpha diversity of the microbial communities of the samples. Diversity analyses were carried out using CLC Genomic Workbench software 20.0.4 equipped with the additional microbial genomic module (Qiagen, Hilden, Germany).

33

34

35

36

A

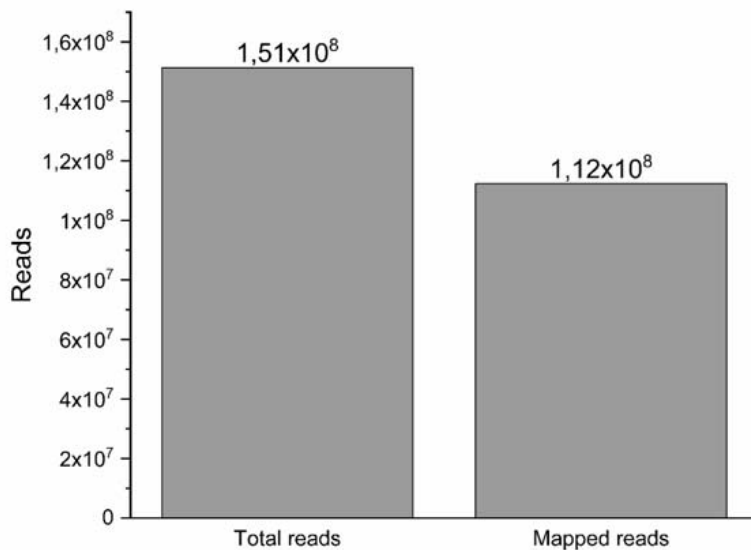

B

|                     |                |
|---------------------|----------------|
| <b>Total reads</b>  | 151,380,100    |
| <b>Mapped reads</b> | 112,366,018    |
| <b>Mapping perc</b> | 74.23 %        |
| <b>Total bases</b>  | 22,858,395,100 |

S3. Mapping statistics of the metagenome. A) Total and mapped reads are shown as well as B) relevant numbers for mapping statistics.

37 **S4.** Taxa within the inoculum that contain at least one of the following genes: *ppk1*, *ppk2*, *phaC*, *phaZ*. Note that the  
 38 nomenclature transcripts per million (TPM) is not the correct term, as this is a metagenomic evaluation. Nevertheless, since  
 39 this is an established term and to remain consistent with previous work, we follow the argumentation of Tamames and Puente-  
 40 Sánchez and maintain the nomenclature "TPM" (Tamames and Puente-Sánchez 2019).

| Family                                 | „TPM“                   |                         |                         |                         |        |
|----------------------------------------|-------------------------|-------------------------|-------------------------|-------------------------|--------|
|                                        | <i>ppk1</i><br>(K00937) | <i>ppk2</i><br>(K22468) | <i>phaZ</i><br>(K03821) | <i>phaC</i><br>(K05973) | Total  |
| <i>Bradyrhizobiaceae</i>               | 0.557                   | 0                       | 0.482                   | 0.479                   | 1.518  |
| <i>Comamonadaceae</i>                  | 2.895                   | 2.19                    | 5.053                   | 7.625                   | 17.763 |
| <i>Hyphomicrobiaceae</i>               | 0.914                   | 0.753                   | 2.387                   | 0.969                   | 5.023  |
| <i>Phyllobacteriaceae</i>              | 0.454                   | 0                       | 0.422                   | 0.429                   | 1.305  |
| <i>Rhodanobacteraceae</i>              | 5.237                   | 2.578                   | 6.917                   | 2.36                    | 17.092 |
| <i>Rhodobacteraceae</i>                | 0.751                   | 0.129                   | 0.673                   | 0.527                   | 2.08   |
| <i>Rhodocyclaceae</i>                  | 8.939                   | 0                       | 5.402                   | 5.332                   | 19.673 |
| <i>Rhodospirillaceae</i>               | 0.395                   | 0                       | 0.212                   | 0.457                   | 1.064  |
| <i>Burkholderiaceae</i>                | 0                       | 0.101                   | 0.368                   | 0.175                   | 0.644  |
| Unspecified <i>Alphaproteobacteria</i> | 3.195                   | 1.118                   | 2.368                   | 9.373                   | 16.054 |
| Unspecified <i>Betaproteobacteria</i>  | 2.644                   | 13.283                  | 2.996                   | 12.887                  | 31.81  |
| Unspecified <i>Burkholderiales</i>     | 0.669                   | 3.897                   | 11.883                  | 9.993                   | 26.442 |
| Unspecified <i>Proteobacteria</i>      | 6.344                   | 8.82                    | 1.101                   | 16.665                  | 32.93  |
| Unspecified <i>Rhizobiales</i>         | 3.561                   | 1.359                   | 2.432                   | 1.74                    | 9.092  |
| <i>Acetobacteraceae</i>                | 0.397                   | 0                       | 0                       | 0.158                   |        |
| <i>Alcanivoracaceae</i>                | 0.369                   | 0                       | 0                       | 0.184                   |        |
| <i>Bdellovibrionaceae</i>              | 0.344                   | 0                       | 0                       | 0                       |        |
| <i>Campylobacteraceae</i>              | 0.136                   | 0                       | 0                       | 0                       |        |
| <i>Caulobacteraceae</i>                | 0.084                   | 0                       | 0.069                   | 0                       |        |
| <i>Chitinophagaceae</i>                | 0.059                   | 0                       | 0                       | 0                       |        |
| <i>Dietziaceae</i>                     | 0.142                   | 0                       | 0                       | 0                       |        |
| <i>Moraxellaceae</i>                   | 0.515                   | 0.219                   | 0                       | 0.722                   |        |
| <i>Ectothiorhodospiraceae</i>          | 0.078                   | 0                       | 0                       | 0                       |        |
| <i>Intrasporangiaceae</i>              | 2.057                   | 0.32                    | 0                       | 0                       |        |
| <i>Flavobacteriaceae</i>               | 0.225                   | 0                       | 0                       | 0                       |        |
| <i>Gaiellaceae</i>                     | 0.254                   | 0                       | 0                       | 0                       |        |
| <i>Mycobacteriaceae</i>                | 0.12                    | 0.791                   | 0                       | 0                       |        |
| <i>Ignavibacteriaceae</i>              | 10.437                  | 0                       | 0                       | 0                       |        |
| <i>Propionibacteriaceae</i>            | 1.021                   | 1.945                   | 0                       | 0                       |        |
| <i>Isosphaeraceae</i>                  | 0.097                   | 0                       | 0                       | 0                       |        |
| Unspecified <i>Actinobacteria</i>      | 7.251                   | 7.656                   | 0                       | 3.644                   |        |

Taxa having at least one *ppk* gene and *phaC* and *phaZ*

Families included in figure 3 c

|                                            |        |        |       |        |
|--------------------------------------------|--------|--------|-------|--------|
| <i>Methanosarcinaceae</i>                  | 0.278  | 0      | 0     | 0      |
| Unspecified <i>Bacteria</i>                | 70.205 | 21.202 | 0     | 5.098  |
| <i>Methylocystaceae</i>                    | 0.208  | 0      | 0     | 0      |
| Unspecified <i>Bacteroidetes</i>           | 7.859  | 1.864  | 0     | 2.866  |
| Unspecified <i>Acidimicrobiia</i>          | 1.724  | 0.185  | 0     | 0      |
| Unspecified <i>Acidobacteria</i>           | 20.408 | 2.054  | 0     | 0      |
| <i>Nitrosomonadaceae</i>                   | 11.756 | 0      | 0     | 0      |
| Unspecified <i>Chloroflexi</i>             | 18.221 | 6.798  | 0     | 1.804  |
| Unspecified <i>Anaerolineae</i>            | 0.527  | 2.114  | 0     | 0      |
| <i>Planctomycetaceae</i>                   | 0.563  | 0      | 0     | 0      |
| Unspecified <i>Cyanobacteria</i>           | 1.526  | 0.683  | 0     | 0.113  |
| <i>Porphyromonadaceae</i>                  | 0.195  | 0      | 0     | 0      |
| Unspecified <i>Dehalococcoidia</i>         | 0.219  | 1.881  | 0     | 0.104  |
| Unspecified <i>Deltaproteobacteria</i>     | 0.09   | 0      | 0     | 5.292  |
| <i>Porticoccaceae</i>                      | 0.075  | 0      | 0     | 0      |
| Unspecified <i>Gammaproteobacteria</i>     | 7.899  | 0.626  | 0     | 27.218 |
| Unspecified <i>Bacteroidales</i>           | 0.838  | 0.237  | 0     | 0      |
| <i>Spirochaetaceae</i>                     | 0.394  | 0      | 0     | 0      |
| „ <i>Candidatus Sumerlaeota</i> “          | 0.078  | 0.057  | 0     | 0      |
| Unspecified <i>Euryarchaeota</i>           | 0.214  | 0.086  | 0     | 0      |
| Unspecified <i>Bdellovibrionales</i>       | 0.093  | 0      | 0.306 | 0      |
| Unspecified <i>Caldilineae</i>             | 0.078  | 0      | 0     | 0      |
| „ <i>Candidatus Omnitrophica</i> “         | 4.87   | 0      | 0     | 0      |
| Unspecified <i>Cellvibrionales</i>         | 0.159  | 0      | 0     | 0      |
| Unspecified <i>Chlorobi</i>                | 0.572  | 0      | 0     | 0      |
| Unspecified <i>Clostridiales</i>           | 0.439  | 0      | 0     | 0      |
| Unspecified <i>Flavobacteriales</i>        | 0.052  | 0      | 0     | 0      |
| Unspecified <i>Ignavibacteria</i>          | 0.132  | 0      | 0     | 0      |
| Unspecified <i>Ignavibacteriae</i>         | 0.265  | 0      | 0     | 0      |
| Unspecified <i>Ignavibacteriales</i>       | 0.681  | 0.373  | 0     | 0      |
| Unspecified <i>Lentisphaerae</i>           | 0.375  | 0.265  | 0     | 0      |
| Unspecified <i>Methanomassiliicoccales</i> | 0.42   | 0.16   | 0     | 0      |
| Unspecified <i>Methanomicrobiales</i>      | 0.889  | 0      | 0     | 0      |
| Unspecified <i>Myxococcales</i>            | 0.88   | 0      | 0     | 0      |
| Unspecified <i>Phycisphaerae</i>           | 0.3    | 0.137  | 0     | 0.141  |
| Unspecified <i>Planctomycetales</i>        | 0.07   | 0      | 0     | 0      |

|                                        |       |       |       |       |
|----------------------------------------|-------|-------|-------|-------|
| Unspecified <i>Planctomycetes</i>      | 2.283 | 0.327 | 0     | 0.42  |
| Unspecified <i>Planctomycetia</i>      | 0.364 | 0     | 0     | 0.08  |
| Unspecified <i>Propionibacteriales</i> | 1.046 | 0.303 | 0     | 0     |
| Unspecified <i>Rhodospirillales</i>    | 0.288 | 0     | 0     | 1.302 |
| Unspecified <i>Solirubrobacterales</i> | 0.322 | 0.322 | 0     | 0     |
| Unspecified <i>Sphingobacteriales</i>  | 1.249 | 0     | 0     | 0     |
| Unspecified <i>Sphingobacteriia</i>    | 0.183 | 0     | 0     | 0     |
| Unspecified <i>Spirochaetales</i>      | 0.105 | 0     | 0     | 0     |
| Unspecified <i>Spirochaetes</i>        | 0.061 | 0     | 0     | 0     |
| Unspecified <i>Thermomicrobiales</i>   | 0.569 | 0     | 0     | 0     |
| Unknown                                | 2.82  | 1.458 | 0     | 0.378 |
| Unspecified <i>Verrucomicrobia</i>     | 2.355 | 0.715 | 0     | 0.062 |
| Unspecified <i>Verrucomicrobiales</i>  | 0.815 | 0     | 0     | 0     |
| Unspecified <i>Xanthomonadales</i>     | 0.091 | 0     | 0     | 0.042 |
| <i>Xanthomonadaceae</i>                | 0.172 | 0     | 0     | 0     |
| <i>Actinomycetaceae</i>                | 0     | 0.124 | 0     | 0     |
| <i>Aeromonadaceae</i>                  | 0     | 0.086 | 0     | 0     |
| <i>Anaerolineaceae</i>                 | 0     | 0.105 | 0     | 0     |
| <i>Caldilineaceae</i>                  | 0     | 0.096 | 0     | 0     |
| <i>Frankiaceae</i>                     | 0     | 0.142 | 0     | 0     |
| <i>Gordoniaceae</i>                    | 0     | 0.527 | 0     | 0     |
| <i>Microbacteriaceae</i>               | 0     | 0.12  | 0     | 0     |
| <i>Streptomycetaceae</i>               | 0     | 0.066 | 0     | 0     |
| Unspecified <i>Bacillales</i>          | 0     | 2.248 | 0     | 0     |
| „ <i>Candidatus</i> Dadabacteria“      | 0     | 0.128 | 0     | 0.144 |
| „ <i>Candidatus</i> Gracilibacteria“   | 0     | 0.068 | 0     | 0     |
| „ <i>Candidatus</i> Melainabacteria“   | 0     | 0.069 | 0     | 0     |
| Unspecified <i>Corynebacteriales</i>   | 0     | 0.139 | 0     | 0.128 |
| Unspecified <i>Firmicutes</i>          | 0     | 0.17  | 0     | 0     |
| Unspecified <i>Nitrosomonadales</i>    | 0     | 0.077 | 0     | 0     |
| Unspecified <i>Nitrospira</i>          | 0     | 0.282 | 0     | 0     |
| Unspecified <i>Rhodocyclales</i>       | 0     | 0.279 | 0     | 5.3   |
| Unspecified <i>Syntrophobacterales</i> | 0     | 0.091 | 0     | 0     |
| <i>Methylobacteriaceae</i>             | 0     | 0     | 0.133 | 0.089 |
| <i>Legionellaceae</i>                  | 0     | 0     | 0     | 0.763 |
| <i>Oxalobacteraceae</i>                | 0     | 0     | 0     | 0.11  |

|                                      |   |   |       |       |
|--------------------------------------|---|---|-------|-------|
| <i>Rhodobiaceae</i>                  | 0 | 0 | 0     | 0.183 |
| <i>Sphingobacteriaceae</i>           | 0 | 0 | 0     | 0.957 |
| <i>Sphingomonadaceae</i>             | 0 | 0 | 0     | 0.333 |
| <i>Syntrophomonadaceae</i>           | 0 | 0 | 0     | 0.385 |
| „ <i>Candidatus Rokubacteria</i> “   | 0 | 0 | 0     | 0.091 |
| Unspecified <i>Clostridia</i>        | 0 | 0 | 0     | 0.03  |
| Unspecified <i>Holophagae</i>        | 0 | 0 | 0     | 0.992 |
| Unspecified <i>Oceanospirillales</i> | 0 | 0 | 0     | 0.152 |
| Unspecified <i>Sphingomonadales</i>  | 0 | 0 | 0     | 0.197 |
| <i>Bacteriovoracaceae</i>            | 0 | 0 | 0.172 | 0     |
| <i>Rhizobiaceae</i>                  | 0 | 0 | 0.054 | 0     |
| Unspecified <i>Oligoflexia</i>       | 0 | 0 | 0.113 | 0     |
| Unspecified <i>Thermoleophilia</i>   | 0 | 0 | 0.115 | 0     |

41  
42

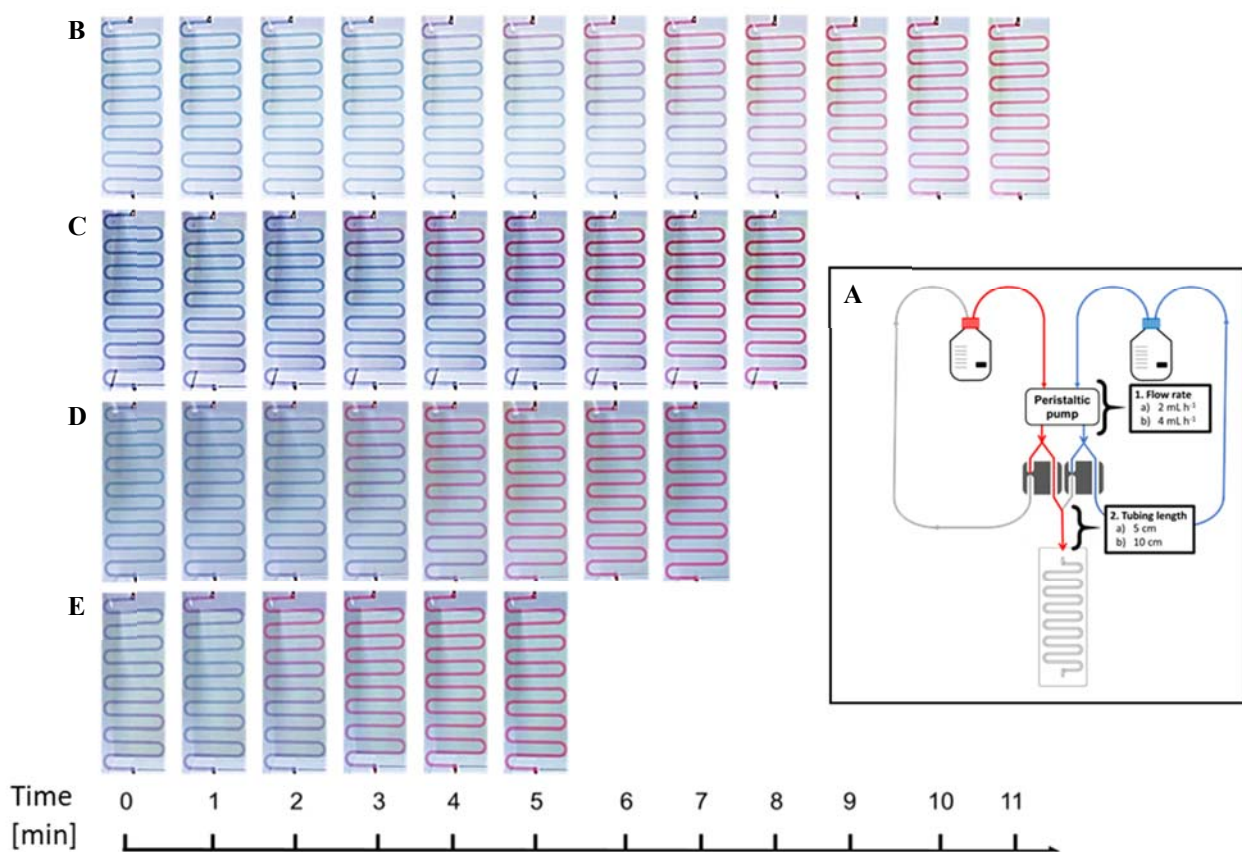

**S5.** Validation of the experimental setup for the cultivation in microfluidic chips, under cyclic change of two dye solutions. At time point  $t = 0$  the solenoid valves (dark gray) were switched so that instead of blue fluid, red fluid was pumped into the chip. **A)** A scheme of the experimental setup is shown. Two flow rates (2 and 4  $\text{mL h}^{-1}$ ) with different distances of the valves to the chip (5 and 10 cm) were examined. **B)** 2  $\text{mL h}^{-1}$ , 10 cm. **C)** 2  $\text{mL h}^{-1}$ , 5 cm. **D)** 4  $\text{mL h}^{-1}$ , 10 cm. **E)** 4  $\text{mL h}^{-1}$ , 5 cm.

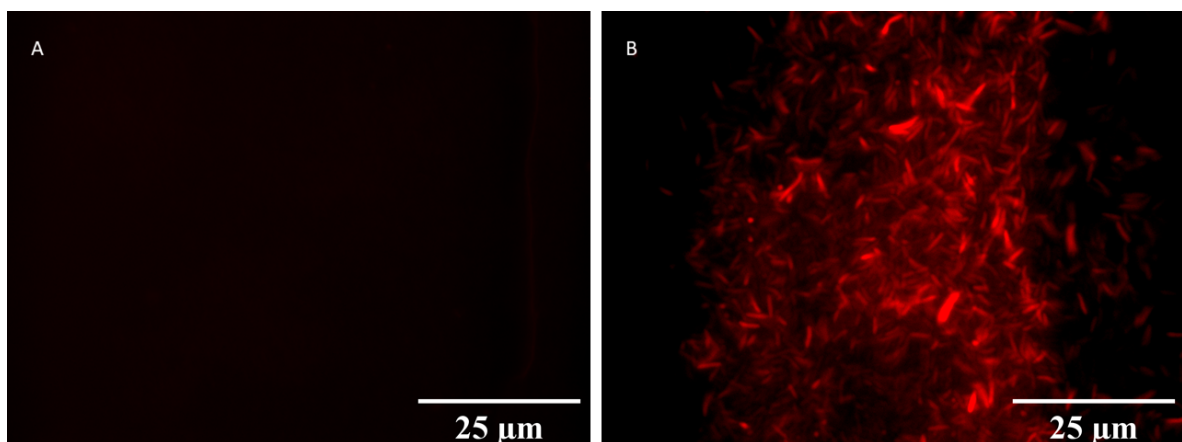

**S6.** Confirmation of anoxic conditions inside the cultivation channels. *Shewanella oneidensis* cells carrying a pMK-RQ plasmid with a red fluorescent protein (RFP) gene were grown for three days under anoxic conditions prior to the microscopic analysis (**A**). Following, the nitrogen replenishment was disconnected, and images were taken again (**B**) revealing clear RFP signals under oxic conditions.



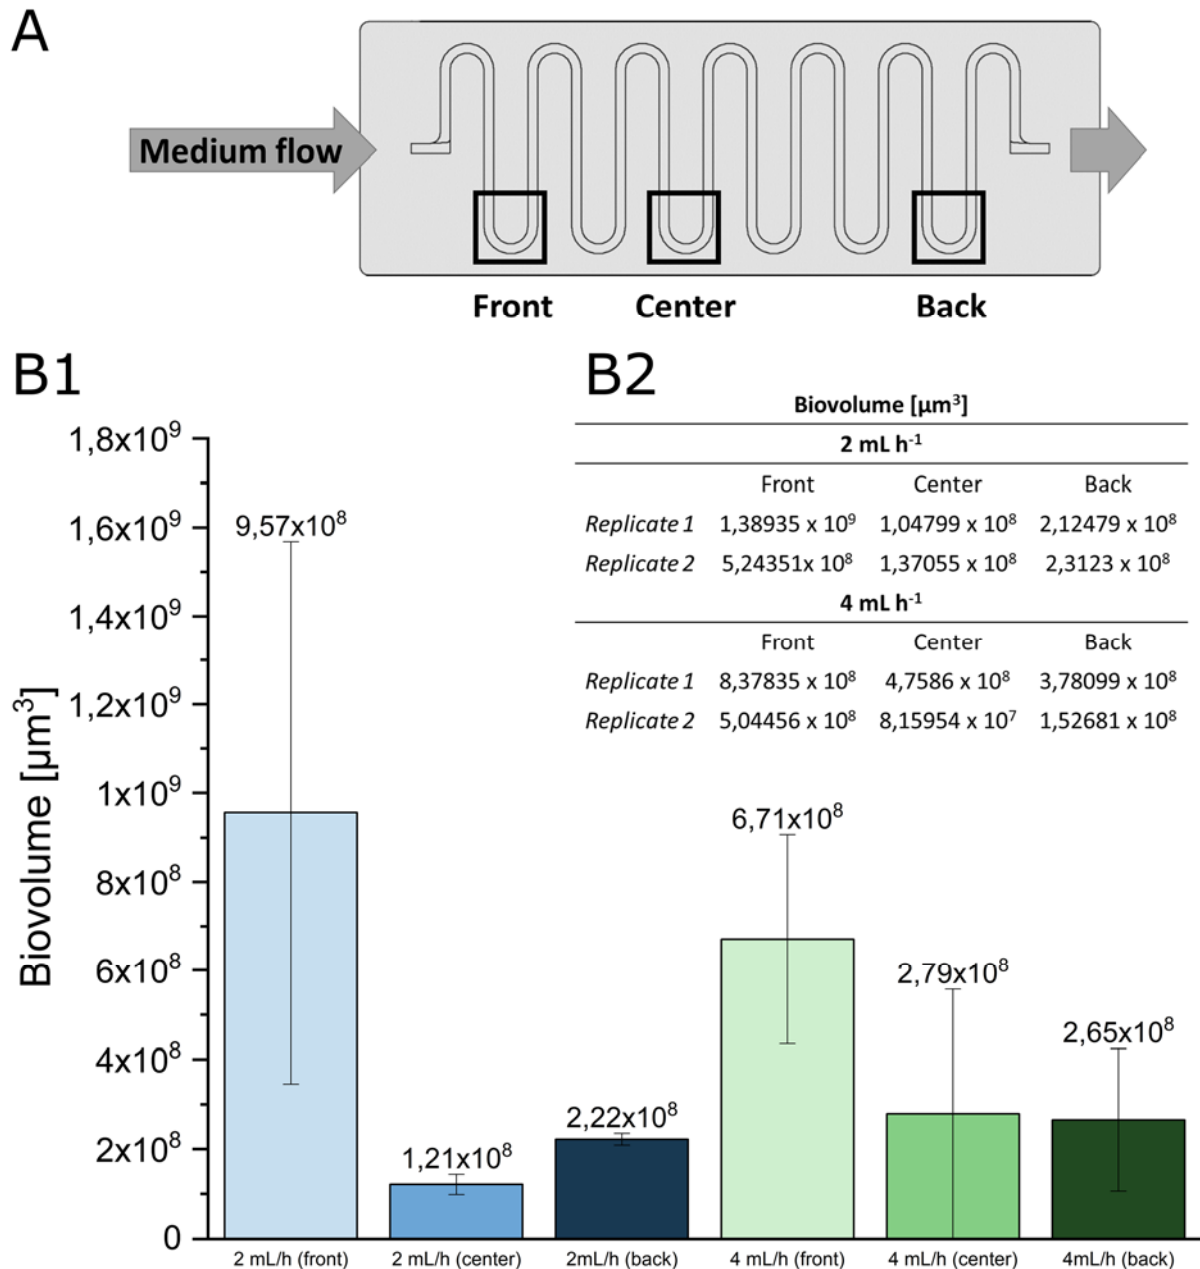

**Figure S7.** Investigation of the mesoscopic biofilm structures using optical coherence tomography (OCT). **A)** The three different locations where data sets were obtained by OCT are shown schematically. **B1)** The biofilm volumes of the two flow regimes are plotted in comparison. One dataset was taken from each chip in the front, middle and rear section of each cultivation channel **(B2)** and the average biovolume of each part was subsequently calculated. Each bar results from the respective duplicate of the two flow rates and error bars show standard error.

43

44

45 **Literature**

46 1. Shannon CE (1997) The Mathematical Theory of Communication. MD Comput 27:379-423.

47 2. Tamames J, Puente-Sánchez F (2019) SqueezeMeta, A Highly Portable, Fully Automatic

48 Metagenomic Analysis Pipeline. Front Microbiol 9:3349.
